# Supplementary material for: Transparent luminescent bulk nanocomposites of polysiloxane embedded with CdS nanocrystallines by a direct dispersion process
Source: Royal Society of Chemistry journal article supplement (doi:10.1039/c2nr11590e), 2012-01-01
Supplement: c2nr11590e.pdf [file c2nr11590e.pdf]

## Supporting Information

Figure S1

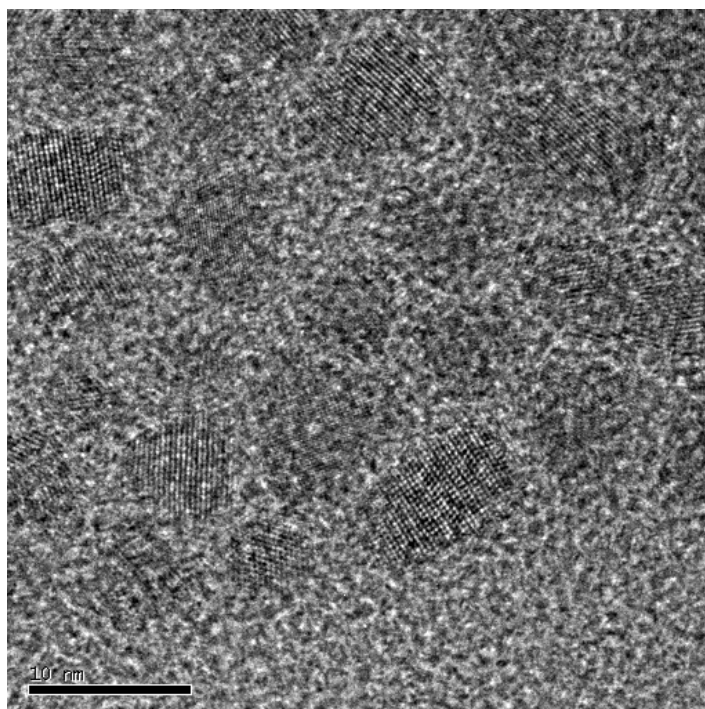

Figure S1. A High resolution transmission electron microscopy (HRTEM) image of the CdS-NCs used for the fabrication of the CdS-NC/PSO composite.

Figure S2

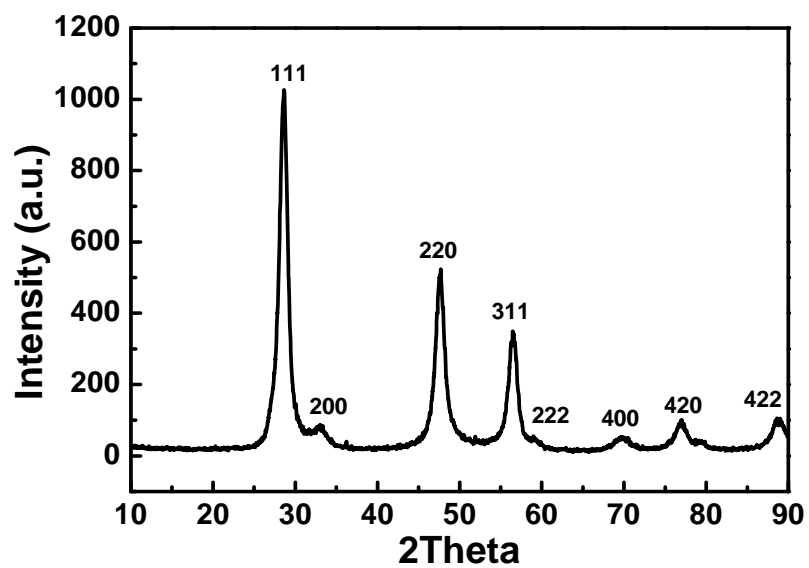

Figure S2. A X-ray diffraction pattern of the CdS-NCs (CuK $\alpha$  radiation).

Figure S3

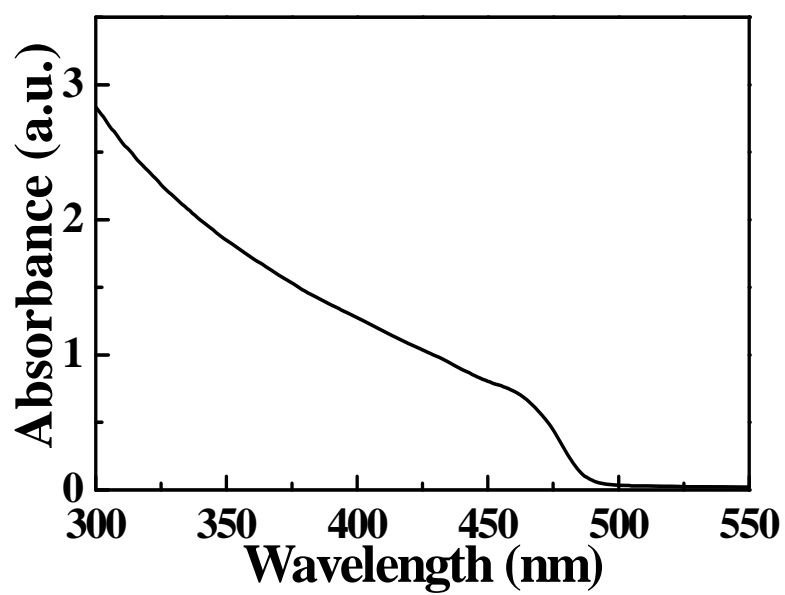

Figure S3. An ultraviolet-visible absorption spectrum of CdS-NCs in hexane ( $6.2 \times 10^{-7}$  mol/L)
